1 **InsectOR – webserver for sensitive identification of insect olfactory re-**  
2 **ceptor genes from non-model genomes**

3  
4 Snehal D. Karpe<sup>1,#a,#b</sup>, Vikas Tiwari<sup>1</sup> and Sowdhamini Ramanathan<sup>1\*</sup>

5  
6 <sup>1</sup> National Centre for Biological Sciences (NCBS), TIFR, Bengaluru, Karnataka, India

7 <sup>#a</sup> Current address: Laboratory of Experimental Hematology, Institut Jules Bordet, Université Libre  
8 de Bruxelles, Brussels, Belgium

9 <sup>#b</sup> Current address: Unit of Animal Genomics, GIGA, University of Liège, Liège, Belgium

10 \* Corresponding author

11 Email : [mini@ncbs.res.in](mailto:mini@ncbs.res.in) (RS)

12

## 13 **Abstract**

14           Insect Olfactory Receptors (ORs) are diverse family of membrane protein receptors responsi-  
15 ble for most of the insect olfactory perception and communication, and hence they are of utmost im-  
16 portance for developing repellents or pesticides. Hence, accurate gene prediction of insect ORs from  
17 newly sequenced genomes is an important but challenging task. We have developed a dedicated web-  
18 server, ‘insectOR’, to predict and validate insect OR genes using multiple gene prediction algo-  
19 rithms, accompanied by relevant validations. It is possible to employ this sever nearly automatically  
20 and perform rapid prediction of the OR gene loci from thousands of OR-protein-to-genome align-  
21 ments, resolve gene boundaries for tandem OR genes and refine them further to provide more com-  
22 plete OR gene models. InsectOR outperformed the popular genome annotation pipelines (MAKER  
23 and NCBI eukaryotic genome annotation) in terms of overall sensitivity at base, exon and locus lev-  
24 el, when tested on two distantly related insect genomes. It displayed more than 95% nucleotide level  
25 precision in both tests. Finally, given the same input data and parameters, InsectOR missed less than  
26 2% gene loci, in contrast to 55% loci missed by MAKER for *Drosophila melanogaster*. The web-  
27 server is freely available on the web at <http://caps.ncbs.res.in/insectOR/>. All major browsers are sup-  
28 ported. Website is implemented in Python with Jinja2 for templating and bootstrap framework which  
29 uses HTML, CSS and JavaScript/Ajax. The core pipeline is written in Perl.

30

## 31 **Introduction**

32           Insect biology has been studied extensively over the years for human benefit – to collect hon-  
33 ey, pollinate crops, ward off pests, etc. Recently, these diverse species are also being used as model  
34 organisms for modern experiments to understand their (and in-turn our own) biology in intricate de-  
35 tails. Advent of Next Generation Sequencing (NGS) technologies has given us powers to study this

36 vast diversity at genomic level [1]. Through projects like i5k, thousands of insect genomes and  
37 transcriptomes will be available soon and we need powerful bioinformatics tools to analyse the  
38 data[2,3].

39 Efforts are underway to exploit understanding of insect olfaction to manage pests and disease vectors  
40 [4–6]. Insect Olfaction is also an interesting system for study due to its commonalities and differ-  
41 ences with the vertebrate olfactory system [7–9]. The discovery of insect olfactory receptors was it-  
42 self largely dependent on the early bioinformatics analyses looking for novel protein coding regions  
43 with mammalian 'GPCR-like' properties in *Drosophila melanogaster* genome, which were further  
44 validated using antennae-specific expression [10–13]. Further OR discoveries in other genomes start-  
45 ed to depend on their homology with the *Drosophila* ORs [14–16].

46 Later, vast differences in the average numbers and sub-families of ORs were observed across  
47 various insect orders (Hansson and Stensmyr, 2011, Montagné et al., 2015). Although OR repertoires  
48 from multiple species are available today, they still remain elusive in the genome due to this diversi-  
49 ty. Insect ORs is a diverse family of proteins varying across insect orders [18]. In addition, the gene  
50 models of ORs also vary from one sub-family to another e.g. various OR subfamilies within the in-  
51 sect order Hymenoptera uniquely possess 4 to 9 exons [19]. This leads to lack of well-curated OR  
52 queries for use within general genome annotation pipelines. These automated genome annotations  
53 usually start with de novo gene predictions followed by homology-based corroborations. Probably, as  
54 these pipelines are trained on only one or few model organism annotations before use, they fail to  
55 capture the entire OR gene repertoire in an insect genome. Our previous work has shown that only  
56 60-70% of the total OR gene content is recovered by the general gene annotation pipelines [19,20].  
57 ORs are mostly selectively expressed only in antennae, differ from one insect order to another and  
58 undergo rapid births and deaths as per the requirements of each species, which causes missing and  
59 miss-annotations in the de novo and homology-based gene prediction of these genes. Hence, special

60 efforts (e.g. antennal transcriptome sequencing or extensive manual curation) are necessary to detect  
61 insect ORs with good sensitivity and precision [21].

62 Some of these problems could be alleviated by giving preference to homology-based gene  
63 predictions. In spite of that, we may find faulty gene predictions. ORs are usually present in tandem  
64 repeats in insect genomes and the alignments with OR protein queries may span two different gene  
65 regions and give erroneous gene predictions. This can also lead to miss-annotation of the gene and  
66 intron-exon boundaries. This problem could be addressed by transcriptome sequencing of the anten-  
67 na, which is often costly and dependent on the availability of the antennae samples. It is also most  
68 likely to not cover the entire OR gene repertoire in cases of time-dependent/exposure-dependent ex-  
69 pression of the OR genes [22]. Pipelines like OMIGA [23] are dedicated for insect genomes, but re-  
70 quire transcriptome evidence to recognize OR genes. Hence most insect genome assembly and anno-  
71 tation projects are followed up by time-consuming, further experimental data or laborious homology  
72 dependent manual curation of ORs. To the best of our knowledge, currently there is only one recently  
73 developed, dedicated pipeline or webserver for prediction of genes from a single protein family as  
74 diverse as insect olfactory receptors, however it has been tested on the Niemann-Pick type C2  
75 (NPC2) and insect gustatory receptor (GR) gene families and not olfactory receptors [24]. Hence a  
76 pipeline, with simplified and specific search for this OR family, without incorporating problems of  
77 general genome annotation pipelines, is of great value to the ever-growing insect genomics commu-  
78 nity.

79 We developed such a computational stand-alone pipeline during annotation of ORs from two  
80 solitary bees[20]. We have improved it further, added modules to assist automated refining and vali-  
81 dation of genes and we are presenting it here in the form of a webserver, insectOR. Redundant hits  
82 are filtered, starting from alignment of multiple ORs to the genome of interest, to provide sensitive  
83 prediction of OR gene models.

84

## 85 **Methods**

### 86 **Input parameters**

87 Exonerate alignment file with additional Generic Feature Format (GFF) annotations[25] gen-  
88 erated from insect genome of interest and query OR sequences are mandatory inputs. The related  
89 FASTA files of genome and OR proteins are also necessary for better refinement of the roughly pre-  
90 dicted gene models. The choice of the best protein queries for this search is a crucial step that can be  
91 better addressed by the user with the help of directions given on the ‘About’ page of the webserver  
92 and hence it is currently not automated. This also reduces the resources spent on performing Exoner-  
93 ate on the webserver. More directions on how to run exonerate can also be found at the ‘About’ page  
94 of insectOR.

95 Users can also choose to provide genome annotation from any other source (GFF format) for  
96 additional comparisons with insectOR predictions. One can additionally choose to perform validation  
97 of the predicted proteins using HMMSEARCH [26] against 7tm\_6, the Pfam[27,28] protein family  
98 domain which is characteristic of insect ORs. The presence or absence of the 7tm\_6 domain is rec-  
99 orded. Users may also choose one or more of the three trans-membrane prediction (TMH) methods –  
100 TMHMM2[29,30], HMMTOP2[31,32] and Phobius[33]. If all three methods are selected, additional  
101 Consensus TMH prediction is performed[34]. InsectOR provides an option to perform additional an-  
102 notation using known motifs of the insect ORs with the help of MAST tool from the MEME motif  
103 suite [35,36]. Users can search for default set of 10 protein motifs predicted for *A. florea* ORs [19] or  
104 they may upload their own motifs of interest.

105

### 106 **Output**

107           Statistics on the total number of predicted genes/gene fragments, complete and partial genes,  
108 gene regions with and without putative start sites and pseudogenous/normal gene status are provided  
109 in the final summary of the output (Fig 1A). Additionally, details of the genes encoding proteins with  
110 7tm\_6 domains are provided. Novel OR gene regions annotated by insectOR that are absent in the  
111 user-provided gene annotations are also counted. The details of each predicted OR gene can be stud-  
112 ied from the table available in the next tab (Fig 1B). If the genome sequence is provided by the user,  
113 these gene predictions are displayed in the Dalliance web-embedded genome viewer [37] (Fig 1C). In  
114 case annotations from any other source are provided they are also displayed in the genome viewer  
115 and trimmed version of GFF file overlapping with insectOR prediction is available for download.  
116 Dalliance displays results in a customizable manner for easy comparison with user-provided gene  
117 annotations. Fig 1C illustrates, user-provided genes from NCBI GFF file. Zooming in onto particular  
118 regions gives more information on the coding nucleotides and the protein sequence translated by  
119 them. For the predicted OR gene regions from insectOR, final gene structure is reported in GFF and  
120 BED12+1 format and the putative CDS/transcript and protein sequence are also provided, all of  
121 which are available for download. One may use the GFF/BED12+1 formatted output/s on one of the  
122 various genome annotation editing tools (like Artemis[38], Ugene[39], Web Apollo[40] etc.) for fur-  
123 ther manual curation and editing of these genes. The gene regions with the status of ‘partial’ or  
124 ‘pseudogenous’ or ‘without start codon’ can be particularly targeted for curation. If user chooses to  
125 perform TMH validation by any of the three third-party methods mentioned before, a bar-plot repre-  
126 senting the distribution of number of helices predicted by each selected TMH prediction method is  
127 plotted (Fig 1D). If all the three are selected, consensus TMH [34] is predicted and insectOR pro-  
128 vides details of the four TMH predictions in a new result tab (Fig 1E). In case motif search is select-  
129 ed, the results are available at the last tab (Fig 1F).

130

131 **Fig 1. A sample output from insectOR.** Section A-B and D-F are outputs derived for input Exon-  
132 erate alignments for *Drosophila melanogaster* whereas section C displays information derived from  
133 *Habropoda laboriosa* alignments. Two or more of these sections are available in the output depend-  
134 ing on the analysis chosen by the user.

135

## 136 **Annotation algorithm**

137 Core annotation algorithm is written natively in Perl. It also invokes several other tools as  
138 mentioned in the ‘Input’ section. This algorithm processes the Exonerate alignment data to sensitive-  
139 ly predict the OR coding gene regions and also performs validations as discussed next (Fig 2). The  
140 problem of missing and mis-annotation of tandemly repeated OR genes is addressed using ‘divide  
141 and conquer’ policy as described below.

142 Initially, OR protein-to-genome alignments are identified on the genome as follows. The ex-  
143 onerate output is read for each alignment. For every new genomic scaffold (target in the alignment),  
144 a virtual scaffold with the similar length with score ‘0’ at each nucleotide position is created. Subse-  
145 quently for each alignment, the score at every corresponding nucleotide position is incremented by  
146 one. This leads to virtual subalignments of OR protein-to-genome alignments demarcated by islands  
147 of higher scores (rough OR loci) on the base string of repeated ‘0’ scores (non-‘OR’ loci). As strin-  
148 gent cutoffs are advised for the allowed intron lengths while performing Exonerate alignment (e.g.  
149 2000 nucleotides or less), this step helps to distinguish (‘divide’) between tandem OR genes in the  
150 form of closely situated but distinct alignment islands/clusters.

151 This is followed by the next step of selecting the best alignment/gene model for a set of sub-  
152 alignments. The sub-alignments may sometimes be too short to include full length gene alignments  
153 due to stringent intron length cutoffs. Such smaller alignment regions correspond to fragments of  
154 gene models. To resolve this, initially, the best alignment per set is selected based on the Exonerate

155 alignment score. Corresponding query proteins for each of these best alignments in each cluster are  
156 identified as the best query proteins for the related clusters. For example, query protein OR2, OR3  
157 and OR1 are shown as the best scoring queries in the alignment clusters 1, 2 and 3 from left to right  
158 in Fig 2. For the best queries selected per cluster, all other alignments on the same genomic scaffold  
159 are retained. In this way, from multiple redundant alignments, insectOR retains the best scoring  
160 alignment and also their neighbouring alignments from the same best scoring query.

161         Next, these best neighbouring alignments arising from each query are concatenated into com-  
162 plete protein alignments, if they are arranged congruently in the correct orientation and sequence on  
163 the genomic scaffold. In some cases, the boundary region in the alignments may be extended and the  
164 same region from the query may be aligned to the two different successive locations that need to be  
165 merged (as shown in the Fig 2 for query protein OR1; Amino acids 45 to 50 are aligned at two dif-  
166 ferent locations on the scaffold whereas the flanking regions are different – 5 to 50 and 45 to 150).  
167 These are the cases of wrong extensions of the alignment fragments into introns. For such overlap-  
168 ping regions of the query, the possible exon-intron splicing sites are predicted based on the presence  
169 of ‘gt’ towards the 3’ terminus of the previous exon (region where a protein fragment is aligned) and  
170 presence of ‘ag’ towards 5’ terminus of the next exon (region where next protein fragment is  
171 aligned). The remaining regions are trimmed. All the possible combinations of such fragments are  
172 generated keeping the length of the overlapping region constant (e.g. In the above case of protein  
173 query OR1, there are 6 amino acids overlapping – 45 to 50. All combination of the concatenated nu-  
174 cleotide fragments giving rise to 18 nucleotide regions with flanking splice sites are considered).  
175 Next, the combination of splicing sites and their scores are compared to each other. The concatenated  
176 region providing the best similarity-based score on the Exonerate alignment is retained. In this way,  
177 insectOR finds the best possible splicing sites in cases of the fragmented alignments and stitches  
178 them to generate more complete alignments/gene models. In some cases, genes may possess more



179 than one isoform that are formed by alternative splicing. In such cases, similar region of a query pro-  
180 tein may be aligned at two consecutive locations (e.g. duplicated exons that are alternatively spliced  
181 to give different isoforms). If the overlap is less than 20% of the any of the two query regions, when  
182 aligned, the two hits are kept separate. In case of overlap, multiple parameters, such as completeness  
183 of the gene, higher protein length, non-pseudogenous nature and presence of START codon are ex-  
184 amined (in that order).

185

186 **Fig 2. Annotation algorithm part of the insectOR webserver.** Steps in the annotation  
187 algorithm are displayed here in cartoon representation.

188

189 For further refinement of gene boundaries, each gene/genic fragment (referred as prediction-1  
190 (P1) hits are used as input for another gene structure prediction tool called “GeneWise”. GeneWise is  
191 known to perform well for one-to-one protein-to-DNA alignments[41]. The genomic locus of each  
192 P1 hit is allowed to extend on either side depending upon the length of the hit and maximum bounda-  
193 ry extension of 6000 bp. This empirical cut-off was provided based on the average intergenic region  
194 observed for multiple insect genomes. Along with the extended genomic locus se-quence, the best  
195 aligned query for that region (determined earlier) are given as input to GeneWise. For each P1 hit,  
196 corresponding predicted (P2) hits are generated by running GeneWise. Further, for each locus, both  
197 P1 and P2 hits are compared. If P1 and P2 hits are overlapping, then the best of two is retained and  
198 otherwise both the hits are retained. Final hit is modified by locating the START and STOP codons  
199 (20 amino acids) upstream or downstream of the current start and end of the alignment and it is final-  
200 ly assigned a name according to its genomic location. Also, the presence of ATG (start codon) at the  
201 N-terminus and pseudogenizing elements (frameshifts or stop codons with respect to the query pro-

202 tein) are noted and included in the gene name. Based on the user-provided completion cut-off (de-  
203 fault: 300 amino acids), a genic region is either declared as complete or partial.

204 In the last step of the pipeline, various validations on the predicted protein sequences are per-  
205 formed. Although TMH prediction programs are not very accurate (and may predict less or more  
206 than 7 helices for an insect OR), the presence of at-least few TMHs (depending on the protein frag-  
207 ment length) is necessary for validation. More robust validation comes from the search for ‘7tm\_6’  
208 domain. Users may also choose to scan for protein motifs of interest in the predicted proteins. With  
209 more ongoing research on insect ORs, presence or absence of certain OR protein motifs may provide  
210 affirmation of their specific insect order origin [42] and might also provide clues regarding the kind  
211 of the odorants they bind to and may even assist in deorphanization of few of these ORs [43]. Evi-  
212 dence of more precise gene boundaries of ORs of closely related genomes will certainly improve OR  
213 prediction through homology-based annotation.

214

## 215 **Implementation**

216 The core annotation pipeline, as described in the previous section, is invoked from the  
217 insectOR website. The webserver is written in Python with Jinja2 for templating and bootstrap  
218 framework which uses HTML, CSS and JavaScript/Ajax. Dalliance and its API is used for genome  
219 annotation visualization [37]. InsectOR also makes use of file conversion tools like faToTwobit [44],  
220 `gff_to_bed.py` ([https://github.com/vipints/GFFtools-GX/blob/master/gff\\_to\\_bed.py](https://github.com/vipints/GFFtools-GX/blob/master/gff_to_bed.py)) and  
221 `bedToBigBed`[45,46] for visualisation of the predictions.

222

## 223 **Results and discussion**

### 224 **Evaluation**

225 We discuss the number of ORs we find in two insect genomes through InsectOR webserver in  
226 detail. Although a comparable webserver/method is not available for OR gene prediction specifically,  
227 another general gene annotation pipeline (MAKER) was tested by providing comparable parameters.  
228 MAKER was tuned for OR detection by specifying the maximum intron length of 2000 and by  
229 providing the same input query proteins for its Exonerate runs as provided for the corresponding  
230 insectOR runs. OR search in *Drosophila melanogaster* demonstrated the performance of our method  
231 on a well-annotated species. The second example demonstrated how the search for ORs in a blueber-  
232 ry bee (*H. labriosa*) was made simpler and automatic, using the core pipeline that forms the basis of  
233 this webserver. Taking our own published final annotations of ORs from blueberry bee as a reference  
234 [20], the raw results from the current modified webserver and two other general annotation pipelines  
235 were compared. The general performance of insectOR was found to be better than the others as de-  
236 scribed below.

237

### 238 **Case study 1: *Drosophila melanogaster* ORs**

239 To test insectOR on a well-studied model organism, we chose fruit-fly *Drosophila melano-*  
240 *gaster* genome (assembly Release 6 plus ISO1 MT) belonging to insect order Diptera.

241 The Ensembl reference gene annotations were taken as standard and only OR related infor-  
242 mation was retained. It possesses 61 OR gene loci encoding 65 OR mRNAs (including isoforms).  
243 For testing insectOR, the query protein dataset was built from well-curated 727 non-*Drosophila* OR  
244 protein sequences from NCBI non-redundant protein database belonging to the order Diptera.

245 Exonerate [25] alignment of these proteins against the *Drosophila* genome was performed and  
246 it was provided as an input to insectOR. For de novo gene prediction within MAKER [47], two  
247 methods - AUGUSTUS 2.5.5 [48] and SNAP [49] were implemented. HMM gene model of ‘aedes’  
248 was used for training AUGUSTUS and that of ‘mosquito’ was used for training SNAP de novo gene

249 predictions as the gene models from the same non-‘Drosophila’ species were not available for the  
 250 two methods. The predictions from insectOR and MAKER[47] were compared with those of the  
 251 NCBI as reference using ‘gffcompare’ (<http://ccb.jhu.edu/software/stringtie/gff.shtml>). The results of  
 252 the comparison are discussed in Table 1.

253 **Table 1. *D. melanogaster* OR gene prediction assessment.**

| <b>Reference mRNAs (Ensembl): 65</b>                     |                    |                  |                    |                  |
|----------------------------------------------------------|--------------------|------------------|--------------------|------------------|
| <b>OR prediction method</b>                              | <b>insectOR</b>    |                  | <b>Maker</b>       |                  |
| <b>No of predicted genes/gene-fragments</b>              | 62                 |                  | 25                 |                  |
| <b>Proteins with one or more 7tm_6 predic-<br/>tions</b> | 56                 |                  | 24                 |                  |
| <b>Proteins with multiple 7tm_6 predictions</b>          | 0                  |                  | 9                  |                  |
| <b>Missed exons</b>                                      | 8.6%               |                  | 56.4%              |                  |
| <b>Missed loci</b>                                       | 1.60%              |                  | 55.70%             |                  |
| <b>Matching loci</b>                                     | 35                 |                  | 17                 |                  |
|                                                          | <b>Sensitivity</b> | <b>Precision</b> | <b>Sensitivity</b> | <b>Precision</b> |
| <b>Base</b>                                              | 87                 | 99               | 43                 | 84               |
| <b>Exon</b>                                              | 74                 | 76               | 37                 | 78               |
| <b>Locus</b>                                             | 57                 | 61               | 28                 | 68               |

254  
 255 Out of the total 62 OR gene/fragments predicted by insectOR, 56 can be validated using  
 256 7tm\_6 and they also show 99% base level precision, which means that almost all the OR gene loci  
 257 are identified at correct locations. Fifty-five of these had length more than 300 amino acids. InsectOR  
 258 showed better sensitivity at base, exon and locus levels. Some genes containing ORs, predicted by

259 insectOR, were not complete at the boundaries and hence it showed less precision at the exon and  
260 locus level, as compared to MAKER[47]. At the exon and locus level precision calculation,  
261 gffcompare method searches for exact matches (with only 10 bp allowed deviation at the boundaries)  
262 to be qualified for a true positive hit [50]. However, this better precision at the exon and locus level  
263 for MAKER [47] was at the cost of sensitivity and it missed more than 50% of the OR gene loci  
264 completely. The output of gffcompare for *Drosophila melanogaster* is available in S1 File. This exe-  
265 cution took around 3 hours to process Exonerate alignment file (9.1MB size containing 2099 align-  
266 ments) on insectOR.

267

## 268 **Case study 2: *H. laboriosa* ORs**

269 We evaluated performance of insectOR for a species from another insect order – Hymenop-  
270 tera (includes bees, ants and wasps). As discussed before, the basis of this pipeline was developed  
271 during annotation of ORs from two solitary bees – *Habropoda laboriosa* (Blueberry bee) and  
272 *Dufourea novaeangliae*, of which we have compared *H. laboriosa* predictions here [20]. Compared to  
273 our previous analysis on *A. florea* ORs, which required manual intervention, we found significant  
274 extent of automation for the complete annotation of *H. laboriosa* using insectOR. When the final set  
275 of genes (coming from our complete semi-automated annotation) were compared with those from  
276 NCBI eukaryotic genome annotation pipeline  
([https://www.ncbi.nlm.nih.gov/genome/annotation\\_euk/Habropoda\\_laboriosa/100/](https://www.ncbi.nlm.nih.gov/genome/annotation_euk/Habropoda_laboriosa/100/)) [51], significant  
277 improvement was observed in the coverage of the total number of OR genes and accuracy of gene  
278 models, as discussed. To summarise, after our complete semi-automated analysis, 42 completely new  
279 OR gene regions were found (27% of the total blueberry ORs found) as compared to the NCBI ge-  
280 nome annotations. Eighty-two OR genes (54% of total blueberry ORs) already covered by NCBI  
281 gene annotations had serious problems with the gene and intron-exon boundaries that were corrected.  
282

283 An example of this is shown in Fig 1C where middle panel of ‘User-uploaded-genes’ shows predic-  
284 tion of ORs by NCBI annotation pipeline and the last panel shows predictions from insectOR. In this  
285 case, the NCBI gene annotation has predicted one fused gene model for four distinct OR gene loci, as  
286 it has missed to predict the last exon in each of these genes. Also, it has missed the second gene re-  
287 gion completely which is a pseudogene due to presence of an in-frame STOP codon TGA (as seen in  
288 the zoomed-in version – STOP codon is shown to translate into ‘\*’). For more details on the number  
289 of novel and modified genes, please see the supplementary information in Karpe et. al., 2017.

290 Here we have compared raw OR gene predictions from insectOR (without further manual  
291 curation) with those from MAKER[47] and NCBI[51] (Table 2). The final manually curated gene  
292 predictions from the above mentioned paper were taken as the reference. These 1249 curated OR  
293 protein sequences (without self-OR sequences) were used as input for Exonerate within  
294 MAKER[47]. Similar to *Drosophila*, MAKER[47] annotations were carried out using de novo gene  
295 predictions from AUGUSTUS 2.5.5[48] and SNAP[49], both trained on gene models from *A.*  
296 *mellifera*. In the raw output of our current insectOR webserver, 151 OR gene/gene-fragments were  
297 predicted. Out of these, 103 were complete (>300 amino acids in length) and 134 displayed presence  
298 of 7tm\_6 domain. We could find only 133 OR proteins predicted by MAKER and only 62 by NCBI.  
299 Out of these 133 ORs predicted using MAKER, 65 were complete. But, 23 of the probable complete  
300 ones were more than 500 amino acids in length and were fused protein predictions indicating that  
301 providing similar maximum intron length cut-off for Exonerate was not enough for fine-tuning for  
302 OR gene prediction within MAKER. Similar fused proteins were observed for NCBI gene predic-  
303 tions. This is reflected in the number of proteins with multiple 7tm\_6 domains from MAKER and  
304 NCBI. As shown in the Table 2, for all the measures of performance of the prediction, insectOR per-  
305 formed better than MAKER and NCBI annotations. This example is provided for sample execution  
306 at insectOR. The output of gffcompare for *Habropoda laboriosa* is available in S2 File. The sample

307 execution took less than ten minutes to process Exonerate alignment file (45.9MB size containing  
 308 13180 alignments) on insectOR. Furthermore, we applied InsectOR on five other insect genomes and  
 309 these results are organized in S1-S4 Tables.

310 **Table 2. *H. laboriosa* OR gene prediction assessment.**

| Reference mRNAs [20]: 151                   |             |           |             |           |             |           |
|---------------------------------------------|-------------|-----------|-------------|-----------|-------------|-----------|
| OR prediction method                        | insectOR    |           | Maker       |           | NCBI        |           |
| No of predicted genes/gene-fragments        | 151         |           | 133         |           | 62          |           |
| Proteins with one or more 7tm_6 predictions | 134         |           | 92          |           | 62          |           |
| Missed exons                                | 13.9%       |           | 32.30%      |           | 49.30%      |           |
| Missed loci                                 | 0.7%        |           | 15.30%      |           | 14.00%      |           |
| Matching loci                               | 57          |           | 6           |           | 14          |           |
|                                             |             |           |             |           |             |           |
|                                             | Sensitivity | Precision | Sensitivity | Precision | Sensitivity | Precision |
| Base                                        | 87          | 95        | 73          | 85        | 54          | 80        |
| Exon                                        | 65          | 68        | 31          | 40        | 33          | 55        |
| Locus                                       | 38          | 39        | 4           | 5         | 9           | 23        |

311

## 312 Conclusion

313 InsectOR is a first-of-a-kind webserver for the prediction of ORs from newly sequenced ge-  
 314 nome of insect species. Insect OR genes are diverse across various taxonomical categories and hence  
 315 these are hard to detect for general genome annotation pipelines, which also tend to wrongly predict

316 fused tandem OR gene models. InsectOR outperforms such general genome annotation methods in  
317 providing accurate gene boundaries, reducing the efforts spent on manual curation of this huge fami-  
318 ly of proteins. Overall, InsectOR performed well across two different insect orders and provided best  
319 sensitivity and good precision amongst the methods tested here for OR gene prediction.

320 InsectOR performance is dependent on the initial query set, hence there is a manual interven-  
321 tion of the right choice of queries. Where possible, it is best to employ query sequences which are  
322 evolutionarily close. Though InsectOR annotations are not yet complete for few genes near the gene-  
323 boundaries, it displays the relevant information showing whether each gene is incomplete or  
324 pseudogenous. Further measures (limited manual editing or expression analysis) can be performed  
325 by the user to ensure completeness of these models. With current ongoing projects of sequencing  
326 1000s of insect genomes and transcriptomes, the webserver has potential to serve many entomolo-  
327 gists all over the world. We believe, it will reduce the overall time taken for final manual curation of  
328 OR genes, to about one-fourth, of the usual from our previous experience. It is a first step towards  
329 annotation methods tuned for huge protein families like ORs and in future it could be adapted to oth-  
330 er similar diverse protein families.

331

## 332 **Acknowledgements**

333 We would like to thank, Mr. Murugavel Pavalam for extensive help with improving the core  
334 algorithm of insectOR and also for helping to implement it on the web platform. We would like to  
335 thank National Centre for Biological Sciences (NCBS) for infrastructural facilities.

336

## 337 **References**

338 1. Grimmelikhuijzen CJ, Cazzamali G, Williamson M, Hauser F. The promise of insect



- 339 genomics. *Pest Manag Sci.* 2007;63: 413–416. doi:10.1002/ps.1352
- 340 2. Robinson GE, Hackett KJ, Purcell-Miramontes M, Brown SJ, Evans JD, Goldsmith MR, et al.  
341 Creating a buzz about insect genomes. *Science.* 2011;331: 1386.  
342 doi:10.1126/science.331.6023.1386
- 343 3. Pennisi E. Biologists propose to sequence the DNA of all life on Earth. *Science* (80- ). 2017.  
344 doi:10.1126/science.aal0824
- 345 4. Davis EE. Insect Repellents: Concepts of their Mode of Action Relative to Potential Sensory  
346 Mechanisms in Mosquitoes (Diptera: Culicidae)1. *J Med Entomol.* 1985;22: 237–243.  
347 doi:10.1093/jmedent/22.3.237
- 348 5. Hallem EA, Nicole Fox A, Zwiebel LJ, Carlson JR. Olfaction: Mosquito receptor for human-  
349 sweat odorant. *Nature.* 2004;427: 212–213. doi:10.1038/427212a
- 350 6. Wang G, Carey AF, Carlson JR, Zwiebel LJ. Molecular basis of odor coding in the malaria  
351 vector mosquito *Anopheles gambiae*. *Proc Natl Acad Sci U S A.* 2010;107: 4418–23.  
352 doi:10.1073/pnas.0913392107
- 353 7. Pelosi P, Maida R. Odorant-binding proteins in vertebrates and insects: similarities and  
354 possible common function. *Chem Senses.* 1990;15: 205–215. doi:10.1093/chemse/15.2.205
- 355 8. Ache BW, Young JM. Olfaction: Diverse Species, Conserved Principles. *Neuron.* 2005;48:  
356 417–430. doi:10.1016/J.NEURON.2005.10.022
- 357 9. Kaupp UB. Olfactory signalling in vertebrates and insects: differences and commonalities. *Nat*  
358 *Rev Neurosci.* 2010;11: 188–200. doi:10.1038/nrn2789
- 359 10. Clyne PJ, Warr CG, Freeman MR, Lessing D, Kim J, Carlson JR. A Novel Family of  
360 Divergent Seven-Transmembrane Proteins. *Neuron.* 1999;22: 327–338. doi:10.1016/S0896-  
361 6273(00)81093-4
- 362 11. Vosshall LB, Amrein H, Morozov PS, Rzhetsky A, Axel R. A Spatial Map of Olfactory

- 363 Receptor Expression in the *Drosophila* Antenna. *Cell*. 1999;96: 725–736. doi:10.1016/S0092-  
364 8674(00)80582-6
- 365 12. Kim J, Moriyama EN, Warr CG, Clyne PJ, Carlson JR. Identification of novel multi-  
366 transmembrane proteins from genomic databases using quasi-periodic structural properties.  
367 *Bioinformatics*. 2000;16: 767–775. doi:10.1093/bioinformatics/16.9.767
- 368 13. Kim J, Carlson JR. Gene discovery by e-genetics: *Drosophila* odor and taste receptors. *J Cell*  
369 *Sci*. 2002;115: 1107–12.
- 370 14. Krieger J, Raming K, Dewer YME, Bette S, Conzelmann S, Breer H. A divergent gene family  
371 encoding candidate olfactory receptors of the moth *Heliothis virescens*. *Eur J Neurosci*.  
372 2002;16: 619–628. doi:10.1046/j.1460-9568.2002.02109.x
- 373 15. Robertson HM, Warr CG, Carlson JR. Molecular evolution of the insect chemoreceptor gene  
374 superfamily in *Drosophila melanogaster*. *Proc Natl Acad Sci U S A*. 2003;100 Suppl: 14537–  
375 42. doi:10.1073/pnas.2335847100
- 376 16. Robertson HM, Wanner KW. The chemoreceptor superfamily in the honey bee, *Apis*  
377 *mellifera*: Expansion of the odorant, but not gustatory, receptor family. *Genome Res*. 2006;16:  
378 1395–1403. doi:10.1101/gr.5057506
- 379 17. Montagné N, Fouchier A De, Newcomb RD, Jacquin-joly E, Montagné N, Fouchier A De, et  
380 al. Advances in the Identification and Characterization of Olfactory Receptors in Insects.  
381 *Progress in Molecular Biology and Translational Science*. 2015. pp. 55–80.
- 382 18. Hansson BS, Stensmyr MC. Evolution of Insect Olfaction. *Neuron*. 2011;72: 698–711.  
383 doi:10.1016/j.neuron.2011.11.003
- 384 19. Karpe SD, Jain R, Brockmann A, Sowdhamini R. Identification of Complete Repertoire of  
385 *Apis florea* Odorant Receptors Reveals Complex Orthologous Relationships with *Apis*  
386 *mellifera*. *Genome Biol Evol*. 2016;8: 2879–2895. doi:10.1093/gbe/evw202

- 387 20. Karpe SD, Dhingra S, Brockmann A, Sowdhamini R. Computational genome-wide survey of  
388 odorant receptors from two solitary bees *Dufourea novaeangliae* (Hymenoptera: Halictidae)  
389 and *Habropoda laboriosa* (Hymenoptera: Apidae). *Sci Rep.* 2017;7: 10823.  
390 doi:10.1038/s41598-017-11098-z
- 391 21. Missbach C, Dweck HK, Vogel H, Vilcinskas A, Stensmyr MC, Hansson BS, et al. Evolution  
392 of insect olfactory receptors. *Elife.* 2014;3: e02115. doi:10.7554/eLife.02115
- 393 22. Engsontia P, Sanderson AP, Cobb M, Walden KKO, Robertson HM, Brown S. The red flour  
394 beetle's large nose: an expanded odorant receptor gene family in *Tribolium castaneum*. *Insect*  
395 *Biochem Mol Biol.* 2008;38: 387–397. doi:10.1016/j.ibmb.2007.10.005
- 396 23. Liu J, Xiao H, Huang S, Li F. OMIGA: Optimized Maker-Based Insect Genome Annotation.  
397 *Mol Genet Genomics.* 2014;289: 567–573. doi:10.1007/s00438-014-0831-7
- 398 24. Vizueta J, Sánchez-Gracia A, Rozas J. BITACORA: A comprehensive tool for the  
399 identification and annotation of gene families in genome assemblies. *bioRxiv.* 2019; 593889.  
400 doi:10.1101/593889
- 401 25. Slater GSC, Birney E. Automated generation of heuristics for biological sequence comparison.  
402 *BMC Bioinformatics.* 2005;6: 31. doi:10.1186/1471-2105-6-31
- 403 26. Eddy SR, Crooks G, Green R, Brenner S, Altschul S. Accelerated Profile HMM Searches.  
404 Pearson WR, editor. *PLoS Comput Biol.* 2011;7: e1002195. doi:10.1371/journal.pcbi.1002195
- 405 27. Sonnhammer EL, Eddy SR, Durbin R. Pfam: a comprehensive database of protein domain  
406 families based on seed alignments. *Proteins.* 1997;28: 405–20.
- 407 28. Finn RD, Coghill P, Eberhardt RY, Eddy SR, Mistry J, Mitchell AL, et al. The Pfam protein  
408 families database: towards a more sustainable future. *Nucleic Acids Res.* 2016;44: D279–  
409 D285. doi:10.1093/nar/gkv1344
- 410 29. Sonnhammer EL, von Heijne G, Krogh A. A hidden Markov model for predicting

- 411 transmembrane helices in protein sequences. *Proc Int Conf Intell Syst Mol Biol.* 1998;6: 175–  
412 82.
- 413 30. Krogh A, Larsson B, von Heijne G, Sonnhammer EL. Predicting transmembrane protein  
414 topology with a hidden Markov model: application to complete genomes. *J Mol Biol.*  
415 2001;305: 567–80. doi:10.1006/jmbi.2000.4315
- 416 31. Tusnády GE, Simon I. Principles governing amino acid composition of integral membrane  
417 proteins: application to topology prediction. *J Mol Biol.* 1998;283: 489–506.  
418 doi:10.1006/jmbi.1998.2107
- 419 32. Tusnády GE, Simon I. The HMMTOP transmembrane topology prediction server.  
420 *Bioinformatics.* 2001;17: 849–50.
- 421 33. Käll L, Krogh A, Sonnhammer EL. A Combined Transmembrane Topology and Signal  
422 Peptide Prediction Method. *J Mol Biol.* 2004;338: 1027–1036. doi:10.1016/j.jmb.2004.03.016
- 423 34. Nagarathnam B, Karpe D, Harini K, Sankar K, Iftekhar M, Rajesh D, et al. DOR – a Database  
424 of Olfactory Receptors – Integrated Repository for Sequence and Secondary Structural  
425 Information of Olfactory Receptors in Selected Eukaryotic Genomes. *Bioinform Biol Insights.*  
426 2014;8: 147–158. doi:10.4137/BBi.s14858
- 427 35. Bailey TL, Gribskov M. Combining evidence using p-values: application to sequence  
428 homology searches. *Bioinformatics.* 1998;14: 48–54.
- 429 36. Bailey TL, Boden M, Buske F a., Frith M, Grant CE, Clementi L, et al. MEME Suite: Tools  
430 for motif discovery and searching. *Nucleic Acids Res.* 2009;37: 202–208.  
431 doi:10.1093/nar/gkp335
- 432 37. Down TA, Piipari M, Hubbard TJP. Dalliance: interactive genome viewing on the web.  
433 *Bioinformatics.* 2011;27: 889–890. doi:10.1093/bioinformatics/btr020
- 434 38. Rutherford K, Parkhill J, Crook J, Horsnell T, Rice P, Rajandream MA, et al. Artemis:

- 435 sequence visualization and annotation. *Bioinformatics*. 2000;16: 944–5.  
436 doi:10.1093/BIOINFORMATICS/16.10.944
- 437 39. Okonechnikov K, Golosova O, Fursov M. Unipro UGENE: a unified bioinformatics toolkit.  
438 *Bioinformatics*. 2012;28: 1166–1167. doi:10.1093/bioinformatics/bts091
- 439 40. Lee E, Helt GA, Reese JT, Munoz-Torres MC, Childers CP, Buels RM, et al. Web Apollo: a  
440 web-based genomic annotation editing platform. *Genome Biol*. 2013;14: R93. doi:10.1186/gb-  
441 2013-14-8-r93
- 442 41. Birney E, Clamp M, Durbin R. GeneWise and Genomewise. *Genome Res*. 2004;14: 988–995.  
443 doi:10.1101/gr.1865504
- 444 42. Miller R, Tu Z. Odorant Receptor C-Terminal Motifs in Divergent Insect Species. *J Insect Sci*.  
445 2008;8: 1–10. doi:10.1673/031.008.5301
- 446 43. Ray A, van der Goes van Naters W, Carlson JR. Molecular determinants of odorant receptor  
447 function in insects. *J Biosci*. 2014;39: 555–563. doi:10.1007/s12038-014-9447-7
- 448 44. Kent WJ. BLAT--the BLAST-like alignment tool. *Genome Res*. 2002;12: 656–64.  
449 doi:10.1101/gr.229202. Article published online before March 2002
- 450 45. Kent WJ, Zweig AS, Barber G, Hinrichs AS, Karolchik D. BigWig and BigBed: enabling  
451 browsing of large distributed datasets. *Bioinformatics*. 2010;26: 2204–2207.  
452 doi:10.1093/bioinformatics/btq351
- 453 46. Quinlan AR, Hall IM. BEDTools: a flexible suite of utilities for comparing genomic features.  
454 *Bioinformatics*. 2010;26: 841–2. doi:10.1093/bioinformatics/btq033
- 455 47. Cantarel BL, Korf I, Robb SMC, Parra G, Ross E, Moore B, et al. MAKER: an easy-to-use  
456 annotation pipeline designed for emerging model organism genomes. *Genome Res*. 2008;18:  
457 188–96. doi:10.1101/gr.6743907
- 458 48. Stanke M, Waack S. Gene prediction with a hidden Markov model and a new intron

- 459 submodel. *Bioinformatics*. 2003;19 Suppl 2: ii215-25.
- 460 49. Korf I. Gene finding in novel genomes. *BMC Bioinformatics*. 2004;5: 59. doi:10.1186/1471-  
461 2105-5-59
- 462 50. Burset M, Guigo R. Evaluation of Gene Structure Prediction Programs. *Genomics*. 1996;34:  
463 353–367. doi:10.1006/GENO.1996.0298
- 464 51. Thibaud-Nissen F, Souvorov A, Murphy T, Dicuccio M, Kitts P. Eukaryotic Genome  
465 Annotation Pipeline. The NCBI Handbook [Internet] 2nd edition. Bethesda (MD): National  
466 Center for Biotechnology Information (US); 2013.

467  
468

## 469 **Supporting information captions**

470 **S1 File. The output of gffcompare for *Drosophila melanogaster*.** Detailed result of comparison of  
471 gene annotations by MAKER and insectOR to the NCBI annotations as reference for the *Drosophila*  
472 *melanogaster* genome.

473 **S2 File. The output of gffcompare for *Habropoda laboriosa*.** Detailed result of comparison of gene  
474 annotations by MAKER, NCBI and insectOR to the curated annotations as reference for the  
475 *Habropoda laboriosa* genome.

476 **S1 Table. InsectOR prediction of ORs in *Dufourea novaeangliae*.**

477 **S2 Table. InsectOR prediction of ORs in *Apis florea*.**

478 **S3 Table. InsectOR prediction of ORs in *Anopheles gambiae*.**

479 **S4 Table. InsectOR prediction of ORs in *Leptinotarsa decemlineata*.**
